# Supplementary material
Source: HighWire-hosted journal article supplement (https://jitc.bmj.com/content/10/7/e004037)
Supplement: inline-supplementary-material-1 [file inline-supplementary-material-1.pdf]

**Supplementary Table 1 Clinical characteristics of CRC patients**

| Gender | Age at diagnostic | Disease features                 |
|--------|-------------------|----------------------------------|
| Female | 70                | Rectum adenocacinoma             |
| Female | 58                | Papillary tubular adenocarcinoma |
| Male   | 81                | Rectum adenocacinoma             |
| Male   | 57                | Tubular adenocarcinoma           |
| Female | 72                | Tubular adenocarcinoma           |
| Female | 72                | Rectum adenocacinoma             |

**Supplementary Table 2 ChIP-qPCR primers**

| Gene                   | Forward (5'-3')        | Reverse (5'-3')         |
|------------------------|------------------------|-------------------------|
| <i>Usp21</i> -promoter | TCCCATGCTCATGTTCTCTTGC | GGCCCAGTCCTAGGAGAGATGTT |

**Supplementary Table 3 qRT-PCR primers**

| Gene         | Forward (5'-3')       | Reverse (5'-3')         |
|--------------|-----------------------|-------------------------|
| <i>Usp21</i> | TGATGACTGAGCCAACCACC  | CGTCCCAGCTCCAGTTTCTT    |
| <i>Foxp3</i> | TCCTATCCCCTCCCCTGACAC | GCCTTGGTCAGTGCCATTTTC   |
| <i>CD274</i> | ATTTGCTGAACGCCCCATAC  | TTGGTGGTGGTGGTCTTACC    |
| <i>Mdm2</i>  | GGTGGGAGTGATCAAAGGA   | ACACAGAGCCAGGCTTTCAT    |
| <i>Stub1</i> | TACCTCTCCAGGCTCATTGC  | TCTTGCCACACAGGTAGTCG    |
| <i>Cblb</i>  | CTGACAGGCAGAACTCACCA  | AGACTTTGGTGAACCCGTTG    |
| <i>Rnf31</i> | GTCGGAGCTGTGAGGACTTC  | TCACCCTGCAGTTAGGCTCT    |
| <i>Usp7</i>  | GGAAGCGGGAGATACAGATGA | AAGGACCGACTCACTCAGTCT   |
| <i>Usp44</i> | CTCAACCCTCAGAAATGGCAC | ACGTCGTAGTAACTTCAGGTCTC |
| <i>Usp22</i> | TGGAAATAATCGCCAAGGAG  | GAAGCATGTGTTCCCAAGGT    |

**Supplementary Table 4 Summary of 31 small molecules down regulating FOXP3**

| Names          | Code   |
|----------------|--------|
| Procyanidin B2 | A1-007 |
| Chelerythrine  | A1-106 |
| Gallic acid    | B1-061 |
| Sinomenine     | C1-053 |
| Corynoxine     | E1-012 |
| Caffeic acid   | E1-013 |

|                                               |              |
|-----------------------------------------------|--------------|
| Liquiritigenin                                | E1-072       |
| Palmitic acid                                 | F1-001       |
| Ginsenoside Rb2                               | H-011        |
| Galantamine Hydrobromide                      | H-064        |
| gallic acid ethanol ester                     | H-085        |
| Benzalkonium chloride                         | J102         |
| Sodium nitroferricyanide dihydrate            | J140         |
| Deferoxamine mesylate salt                    | J505         |
| Daunorubicin hydrochloride                    | J403         |
| (2,2-Dichloro-1,1-difluoroethyl) methyl ether | J312         |
| (+)-Usniacin (D-Usnic acid)                   | L1700-07-A10 |
| Limonin                                       | L1700-15-E6  |
| Ramelteon (TAK-375)                           | L1700-02-H8  |
| Estrone                                       | L1700-05-C2  |
| Niacin (Nicotinic acid)                       | L1700-05-G8  |
| Tiotropium Bromide hydrate                    | L1700-10-A5  |
| Tizanidine HCl                                | L1700-13-C10 |
| Cyclophosphamide monohydrate                  | L1700-14-H4  |
| DL-Adrenaline                                 | L1700-15-G2  |
| Nicorandil (Ikorel)                           | L1700-06-F2  |
| Bleomycin sulfate                             | L1700-02-E10 |
| Fluconazole                                   | L1700-03-C7  |
| Ibutilide Fumarate                            | L2000-01-B7  |
| Ticagrelor                                    | L2000-03-G3  |
| Bismuth Subcitrate Potassium                  | L2000-03-D5  |
