# Supplementary material
Source: HighWire-hosted journal article supplement (https://jitc.bmj.com/content/10/7/e004037)

## Supplementary figure 4

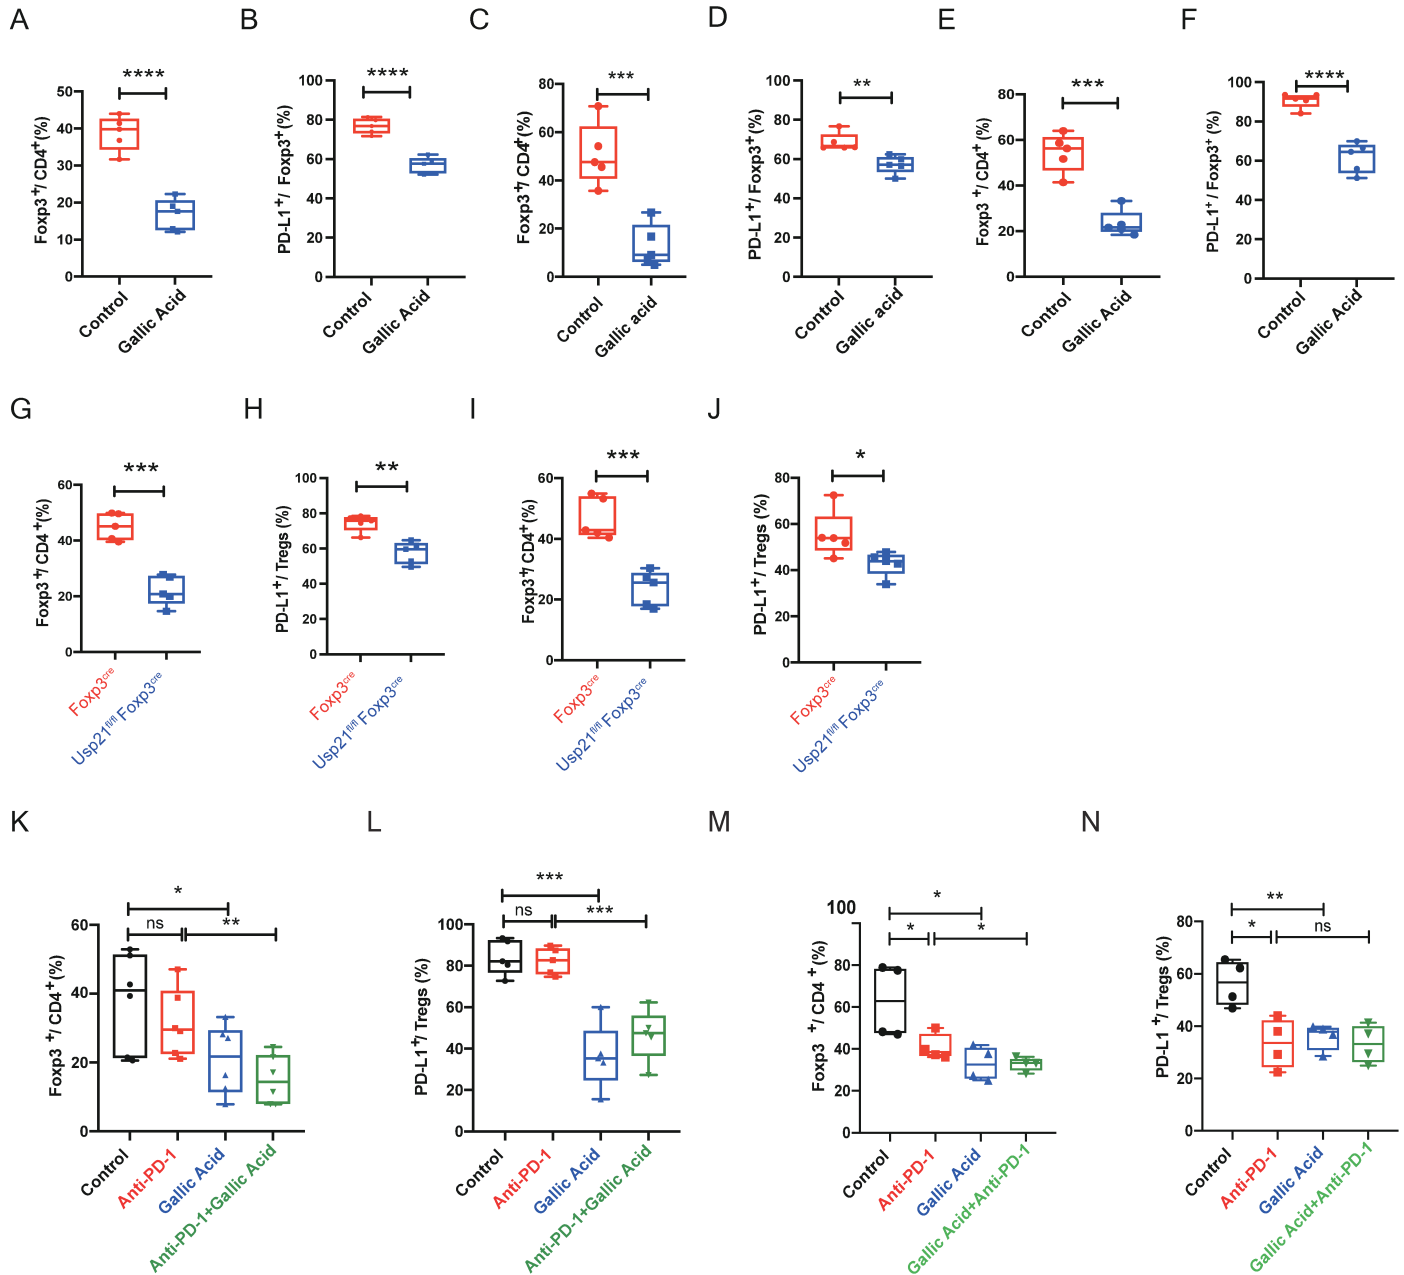

Supplement: inline-supplementary-material-2 [file inline-supplementary-material-2.pdf]

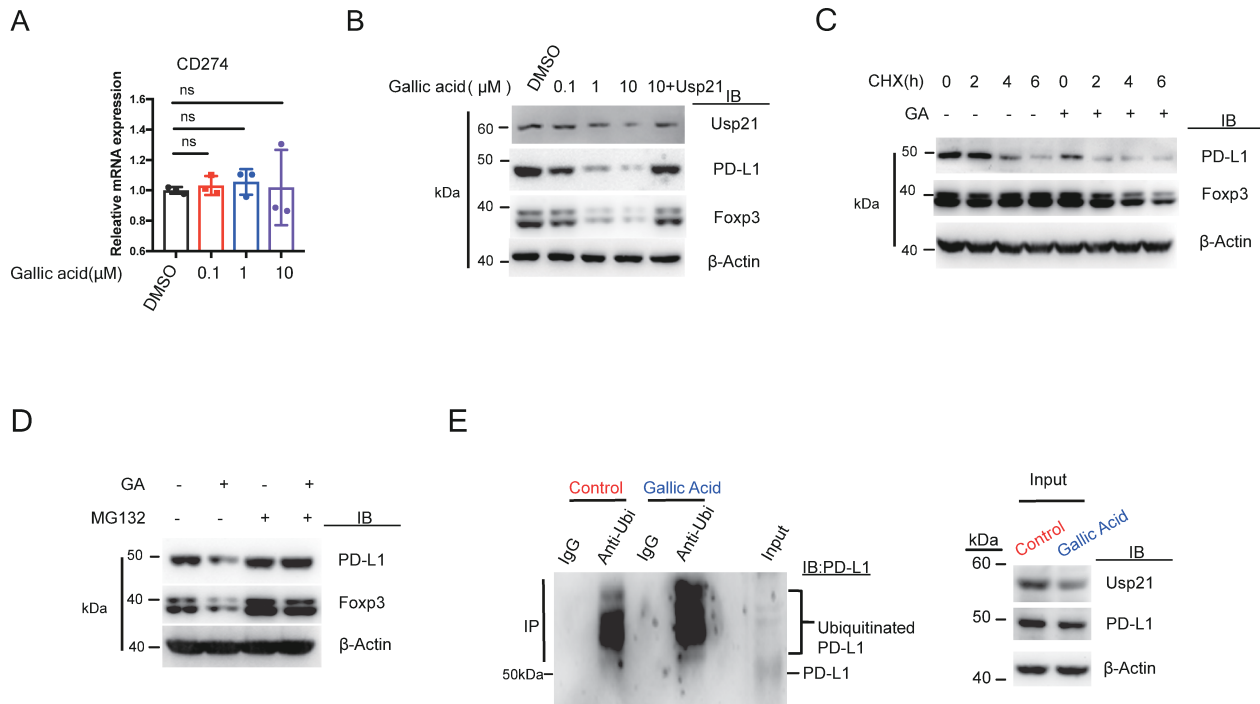

Supplement: inline-supplementary-material-3 [file inline-supplementary-material-3.pdf]

## Supplementary figure 5

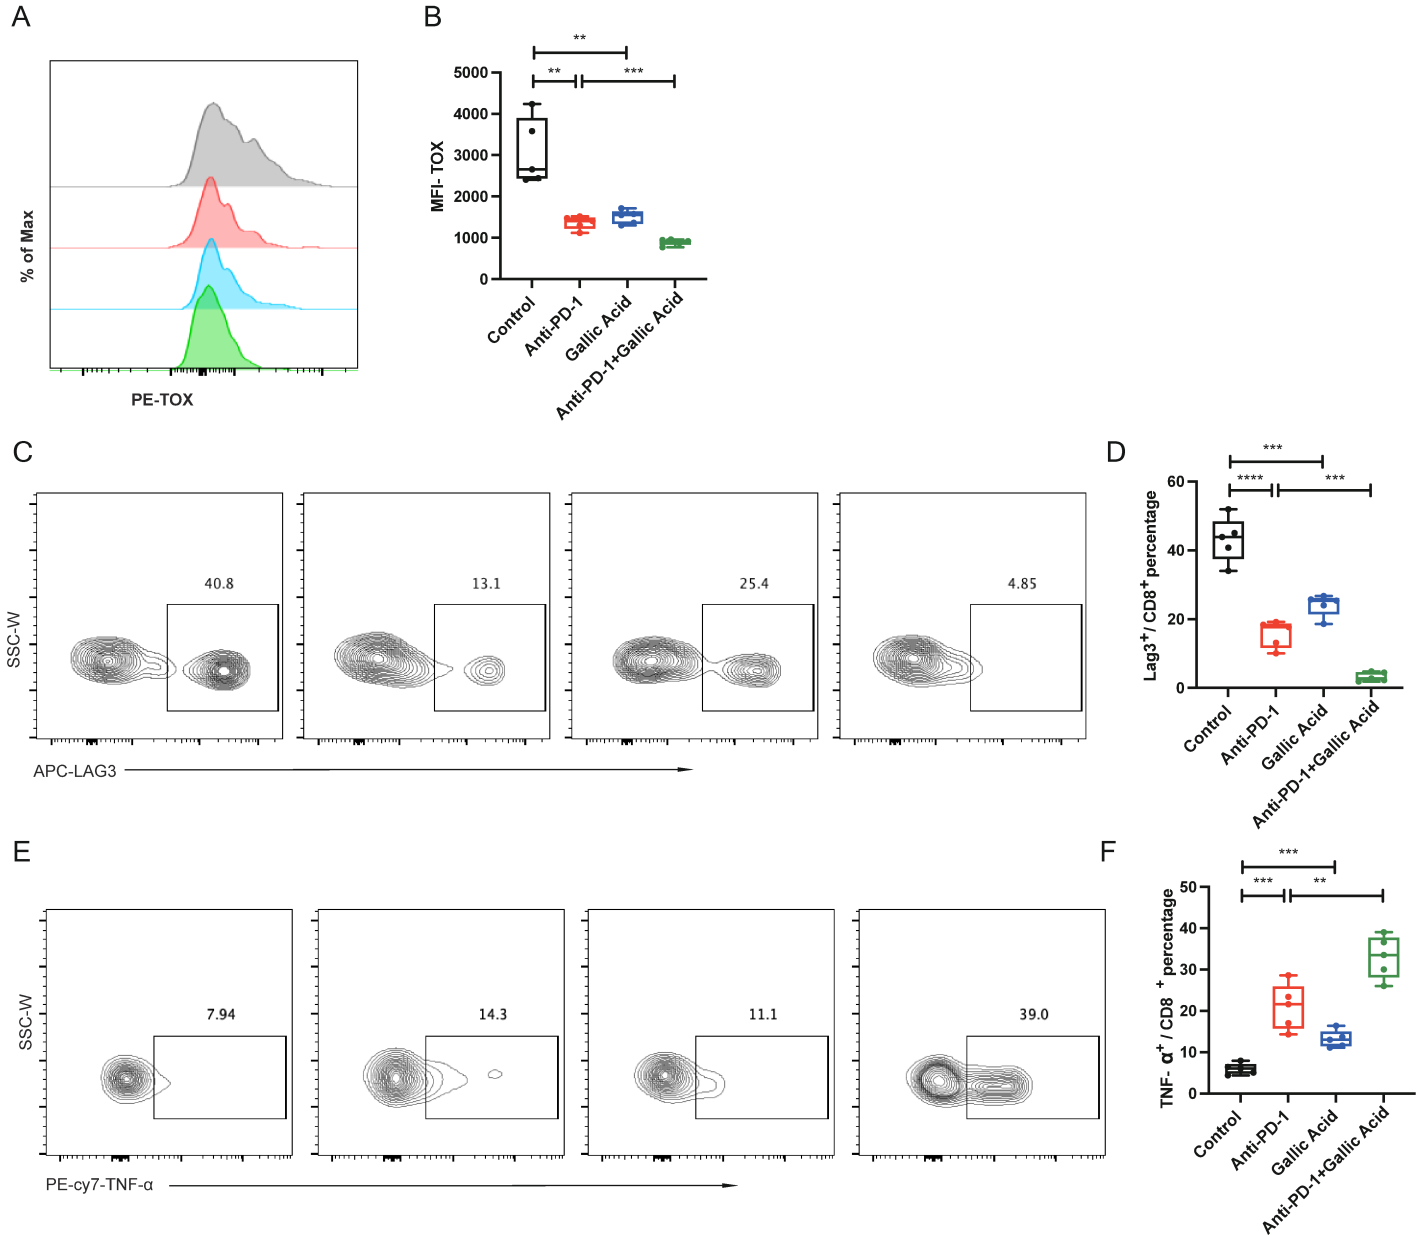

Supplement: inline-supplementary-material-4 [file inline-supplementary-material-4.pdf]

Supplementary figure 6

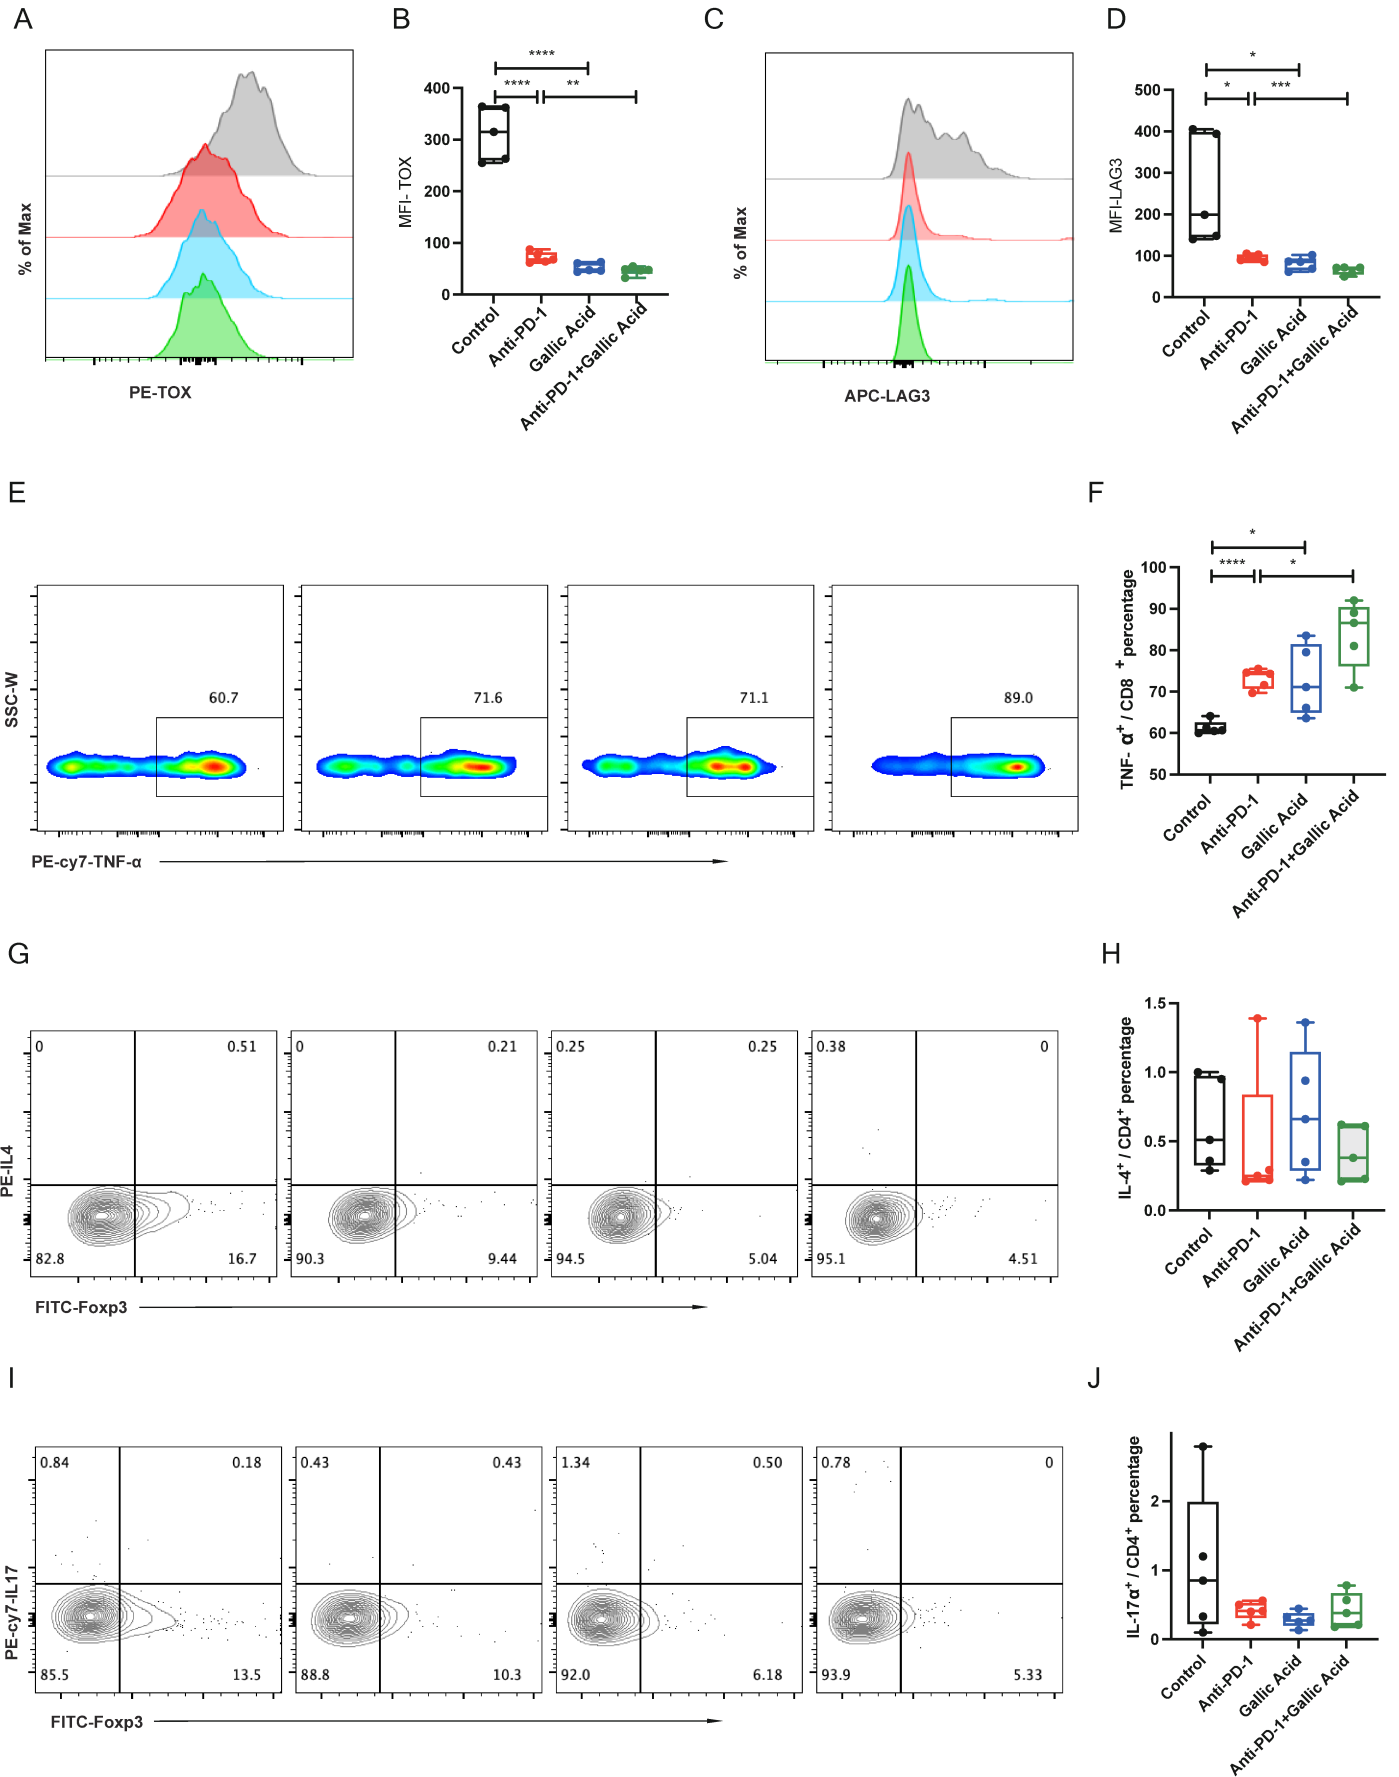

Supplement: inline-supplementary-material-5 [file inline-supplementary-material-5.pdf]

## Supplementary figure 1

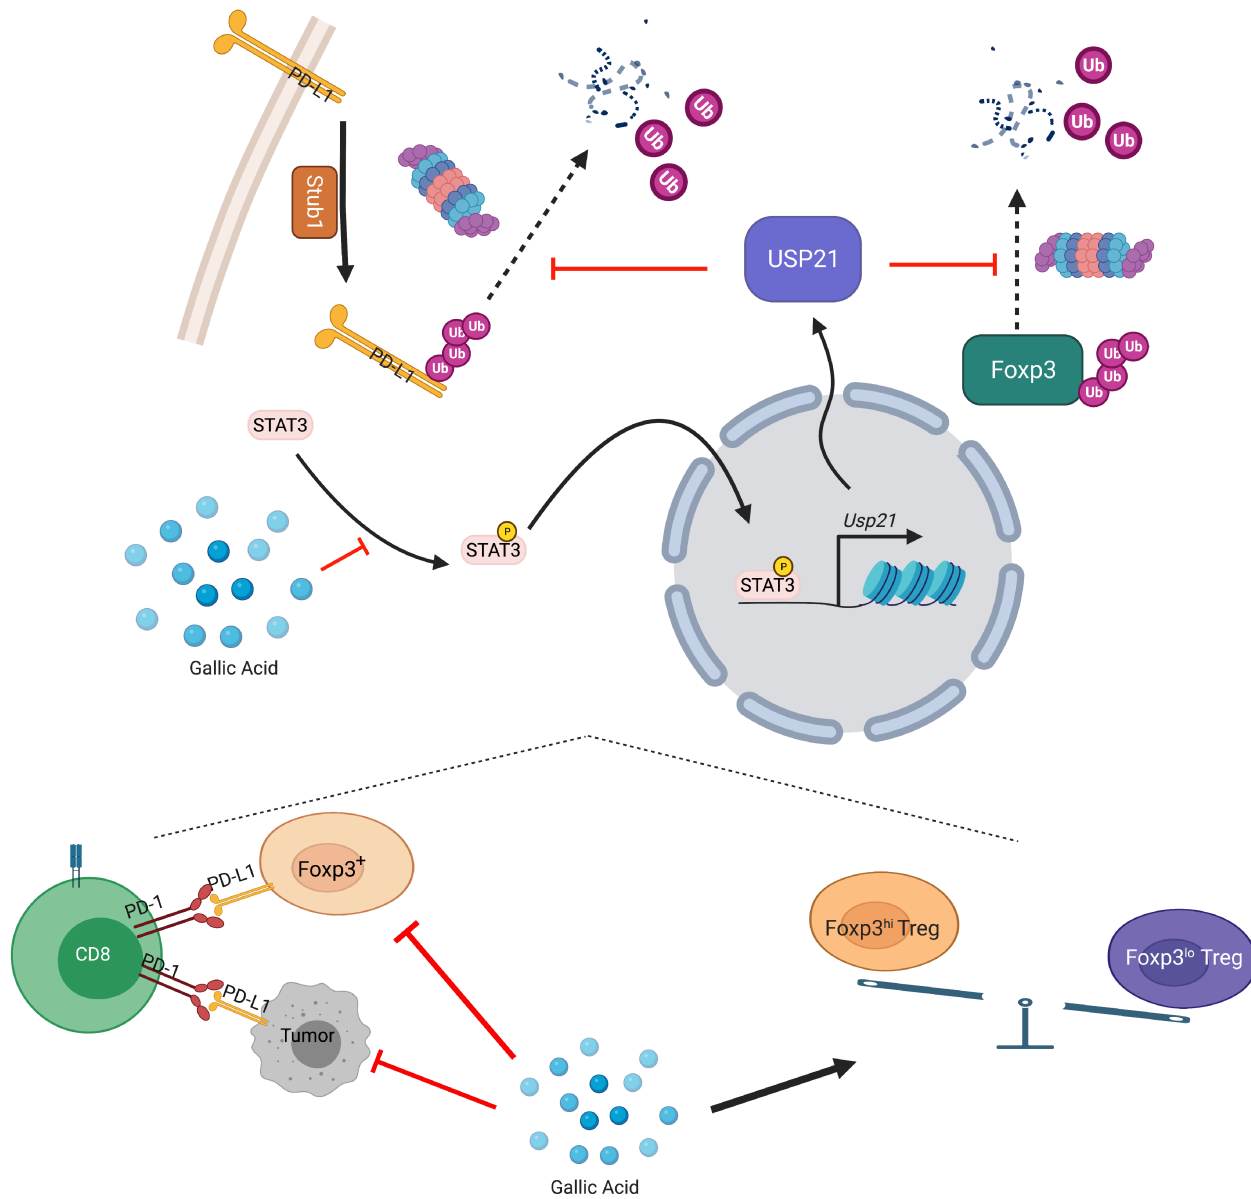

Supplement: inline-supplementary-material-6 [file inline-supplementary-material-6.pdf]

## Supplementary figure 2

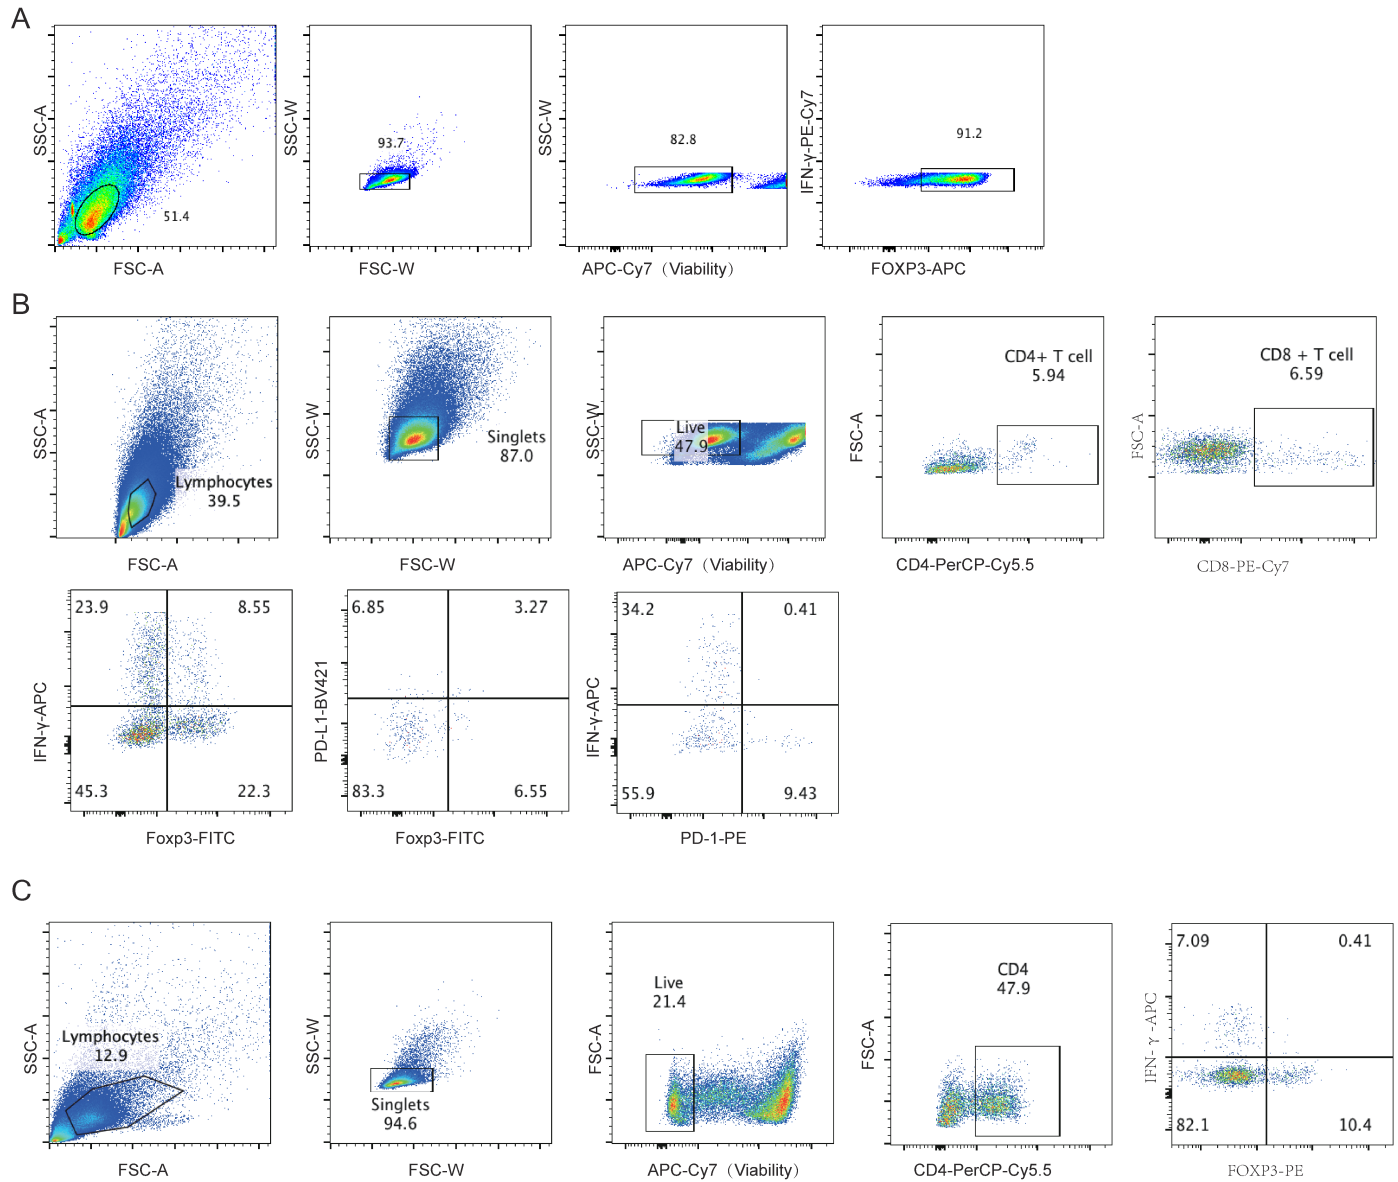

Supplement: inline-supplementary-material-7 [file inline-supplementary-material-7.pdf]
